# Supplementary material for: Industrially-friendly rapid printing of stretchable liquid metal circuits for patch-mode wearable healthcare devices
Source: Royal Society of Chemistry journal article supplement (doi:10.1039/d3tc03612j), 2023-01-01
Supplement: d3tc03612j1.pdf [file d3tc03612j1.pdf]

1 **Industrial-friendly rapid printing of stretchable liquid metal**  
2 **circuit for patch-mode wearable healthcare device**

3

4 **Yanling Jia<sup>1,\*</sup>, Ke Zhang<sup>2,\*</sup>**

5

6 <sup>1</sup> College of Advanced Materials Engineering, Jiaxing Nanhu University,  
7 Jiaxing 314000, China

8 <sup>2</sup> Key Laboratory of Intelligent Sensing Materials and Chip Integration  
9 Technology of Zhejiang Province, Hangzhou Innovation Institute, Beihang  
10 University, Hangzhou 310052, China

11

12 \* Corresponding author

13 E-mail: [jiayl2021@163.com](mailto:jiayl2021@163.com), [cr7zhangke\\_hz@buaa.edu.cn](mailto:cr7zhangke_hz@buaa.edu.cn)

1 **Figure S1**

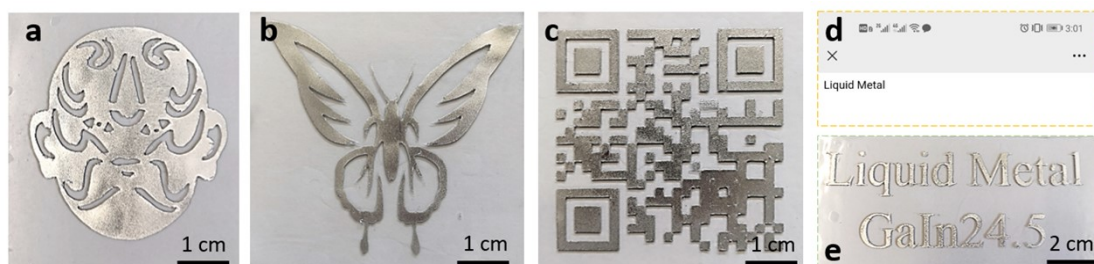

2

3 Figure S1. SALP-prepared patterns of (a) opera facial makeup, (b)

4 butterfly and (c) two-dimensional code. (d) Recognition result of 2D code

5 in Figure S1c. (e) Numbers and letters patterns by SALP.

6

7 **Figure S2**

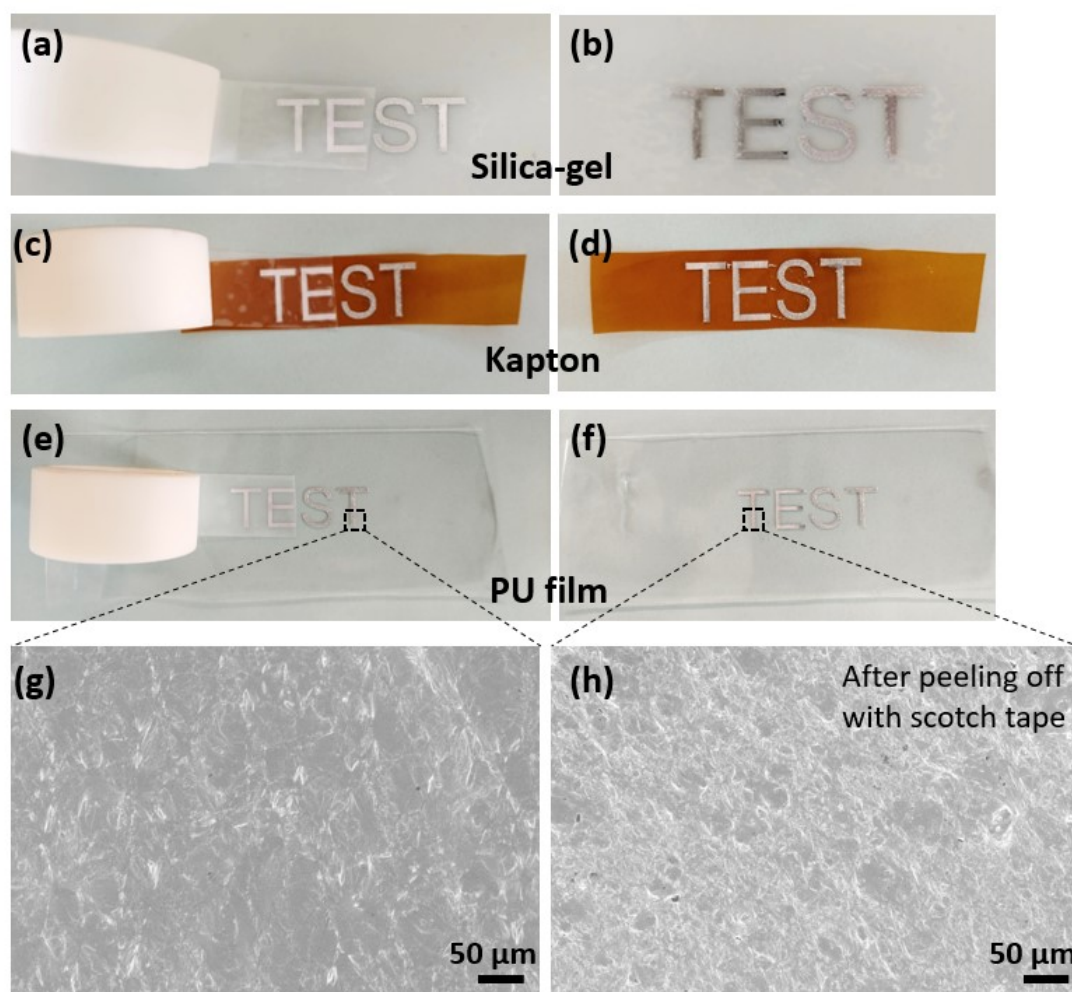

8

1 Figure S2. The optical images of liquid metal pattern printed by SALP  
2 before and after peeling off with scotch tape, on (a-b) silica-gel substrate,  
3 (e-f) Kapton substrate and (e-f) PU substrate, respectively. (g-h) The SEM  
4 images of the surface of liquid metal pattern on PU substrate before and  
5 after peeling off with scotch tape, respectively.

6

7 **Figure S3**

8

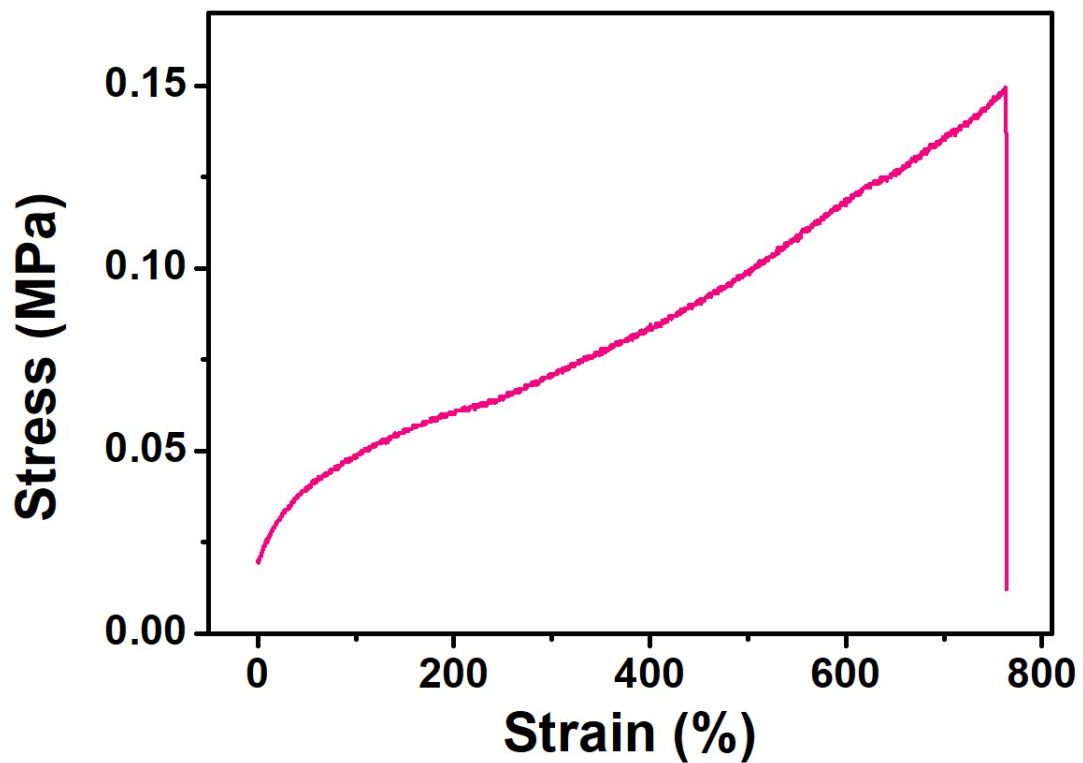

9

10 Figure S3. Stress-strain relationship of PU film.

11

12 **Figure S4**

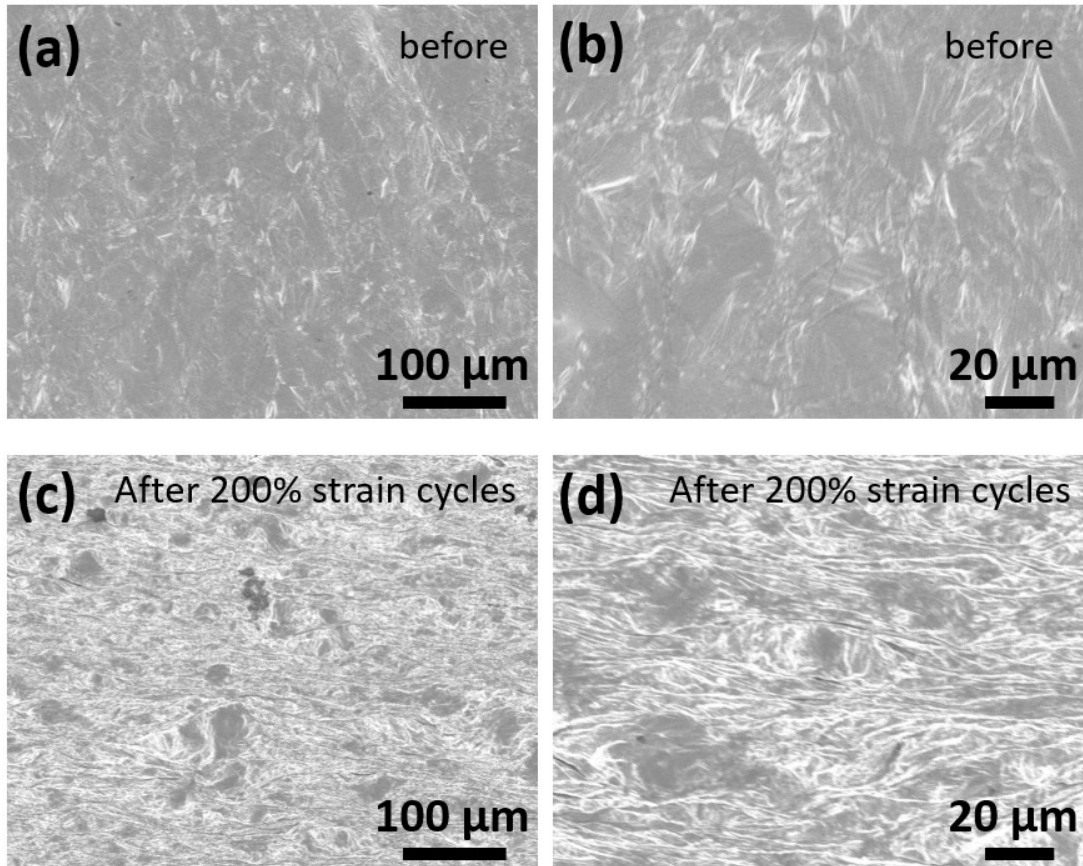

1  
 2 Figure S4. The SEM images of the liquid metal electrode (a-b) before and (c-d) after  
 3 stretching by 200% strain cycles, respectively.

4

5 **Table S1**

6 Table S1. Reference parameters of linear function relationship between  
 7 shadow mask size and the actual size under various prestretching  
 8 conditions ( $y=kx+b$ ,  $y$  is actual size ( $\mu\text{m}$ ) and  $x$  is mask size (mm)).

| <b>Strain</b> | <b>k</b> | <b>b</b> |
|---------------|----------|----------|
| 100%          | 507.23   | 46.29    |
| 200%          | 365.22   | 52.31    |
| 300%          | 284.33   | 42.42    |
| 400%          | 222.10   | 29.64    |
| 500%          | 207.43   | 21.79    |
| 600%          | 187.51   | 13.42    |

1
